# Supplementary material for: Bacterial formation of extracellular U(vi) nanowires
Source: Royal Society of Chemistry journal article supplement (doi:10.1039/c1cc12554k), 2011-01-01

Supporting Information for

**Bacterial Formation of Extracellular U(VI) Nanowires**

Shenghua Jiang<sup>a</sup>, Min-Gyu Kim<sup>c</sup>, Soo-Jin Kim<sup>d</sup>, Hyun Suk Jung<sup>d</sup>, Su Woong Lee<sup>e</sup>, Do Young Noh<sup>e</sup>, Michael J. Sadowsky<sup>f</sup>, and Hor-Gil Hur<sup>a,b\*</sup>

<sup>a</sup>School of Environmental Science and Engineering, and <sup>b</sup>International Environmental Analysis and Education Center, Gwangju Institute of Science and Technology,

Gwangju 500-712, Republic of Korea, Fax: +82-062-970-2434; Tel:

+82-062-970-2437; E-mail: [hghur@gist.ac.kr](mailto:hghur@gist.ac.kr)

<sup>c</sup>Pohang Accelerator Laboratory, Pohang 790-784, Republic of Korea

<sup>d</sup>Korea Basic Science Institute, Daejeon 305-333, Republic of Korea

<sup>e</sup>School of New Material Science and Engineering, Gwangju Institute of Science and Technology, Gwangju 500-712, Republic of Korea,

<sup>f</sup>Department of Soil, Water, and Climate; and BioTechnology Institute, University of Minnesota, St. Paul, MN 55108, USA

\*To whom correspondence should be addressed: Hor-Gil Hur (Tel: +82-062-970-2437;

Fax: +82-062-970-2434; E-mail: [hghur@gist.ac.kr](mailto:hghur@gist.ac.kr)).

## Methods

### Bacterial growth conditions

Culture medium contained 30 mM NaHCO<sub>3</sub>, 10 mM sodium lactate as the electron donor, and ~2 mM uranyl acetate (UO<sub>2</sub>(CH<sub>3</sub>COO)<sub>2</sub>·2H<sub>2</sub>O)) as the electron acceptor for the synthesis of uranium nanowires. The pH was adjusted to 7.0. *S. oneidensis* MR-1 was inoculated into sealed serum bottles with 30 ml N<sub>2</sub> purged culture medium at a final cell density of 2 × 10<sup>8</sup> cells/ml. All the cultures were incubated anaerobically in the dark at 30°C for 120 hrs.

### Measurements of U(VI) and lactate in culture medium

The samples were collected at selected time during incubation for the detection of soluble uranium and lactate consumption in aqueous medium. For measuring the concentration of uranium, the culture supernatants were filtered through a 0.2 μm membrane filter (MFS-25, Advantec MFS, Inc., Dublin, CA), and the filtrates were diluted and acidified with 2% HNO<sub>3</sub> for analysis using inductively-coupled plasma mass spectrometry (ICP-MS, Agilent Technologies 7500ce, Palo Alto, CA). The concentration of lactate was detected by HPLC (Shimazu, Tokyo, Japan), which was equipped with a SPD-10A UV detector (Shimazu, Tokyo, Japan) and a Shodex RSpak KC-811 (8.0mmID\*300mm) column (Shodex, Tokyo, Japan). The mobile phase was 5mM sulfuric acid with a flow rate of 0.5 mL/min, and the UV detection was performed at 210 nm.

### Characterization of materials

The morphology of the uranium nanostructures was examined by using

transmission electron microscopy (TEM). The TEM images and selected area electron diffraction (SAED) were obtained using a Jeol JEM-2100F (Tokyo, Japan).

Cryo-electron microscopy was carried out with culture medium of *S. oneidensis* MR-1 obtained at 12 hr incubation. About 4  $\mu$ l of the sample was suspended onto non-treated 400 mesh copper lacey carbon grids. These grids were then blotted and plunge-frozen using an FEI Vitrobot, Mark I (FEI, Hillsboro, Oregon) with the setting of 100% humidity, 4°C, and blot time of 2.5 seconds. The vitreous ice sample grids were maintained at around -178°C within electron microscope using a side-entry Gatan 626 cryo holder (Gatan, Pleasanton, CA). Detailed technical procedures of cryo-EM were described in ref<sup>1</sup>. The mineralogical property of the nanostructures was investigated by using X-ray diffraction (XRD, D/MAX Uitima III, Rigaku, Tokyo, Japan) spectra, XANES (X-ray absorption near edge structure) and EXAFS (extended X-ray absorption fine structure) spectra (Pohang Accelerator Laboratory, Pohang, Korea).

#### Reference

1. R. A. Grassucci, D. Taylor and J. Frank, *Nat. Protoc.*, 2008, **3**, 330-339.

Figure S1. TEM images of heat-killed *S. oneidensis* MR-1 incubated in the medium with 2 mM uranyl acetate.

ESI Figure S1.

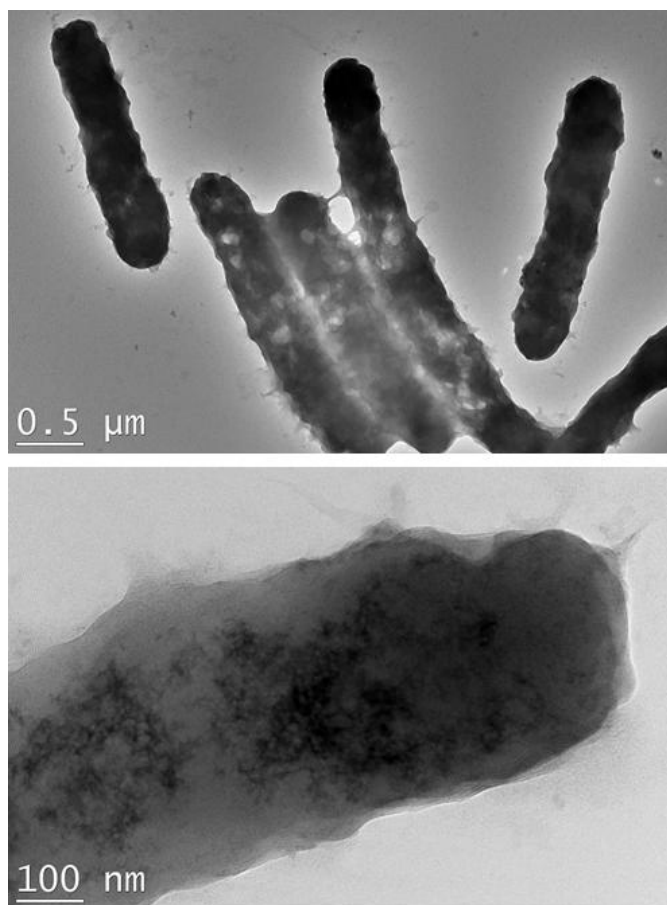

Supplement: c1cc12554k.pdf [file c1cc12554k.pdf]
